# Supplementary material for: Systematic Analysis of the Lysine Malonylome in Sanghuangporus Sanghuang
Source: Research Square preprint supplement (doi:10.21203/rs.3.rs-128142/v1), 2020-12-18
Supplement: Supplementary file 1 [file 0607fc35cf1110abd14a04eb.xlsx]

## Sheet: Table S3
	Table S3. Analysis the sequence motifs of the malonylpeptides
	Motif Logo				Motif	Motif Score	Foreground		Background		Fold Increase
							Matches	Size	Matches	Size
					xxxxxxxxxx_K_xxxxxxxKxx	7.23	84	714	11390	179343	1.9
