# Supplementary material for: Systematic Analysis of the Lysine Malonylome in Sanghuangporus Sanghuang
Source: Research Square preprint supplement (doi:10.21203/rs.3.rs-128142/v1), 2020-12-18
Supplement: Supplementary file 3 [file 2cac1fa690d80d203a38a87e.xlsx]

## Sheet: Table S7
Table S7. The proteins obtained from PPI network analysis
Protein accession	Name in Links	Display name	Gene name	Protein description	No.Sites	Degree	Amino acid	Position	Charge	Localization probability	Mass error [ppm]	Modified sequence	MS/MS Count	PEP	Score	MCODE_Cluster	MCODE_Node_Status	MCODE_Score
Unigene7433_SANG_Gene.63721	130	fsa1	fsa1	Hybrid PKS-NRPS synthetase fsa1 OS=Fusarium sp. (strain FN080326) OX=1608308 GN=fsa1 PE=3 SV=1	26	1	K	1788	2	1	-0.75037	K(1)ESPIAYR	1	0.00737266	54.784		Unclustered	0
Unigene2834_SANG_Gene.58703	149	hsp90	hsp90	Heat shock protein 90 OS=Neosartorya fumigata (strain ATCC MYA-4609 / Af293 / CBS 101355 / FGSC A1100) OX=330879 GN=hsp90 PE=1 SV=3	15	12	K	391	3	1	0.36584	K(1)CLDLFQEIAEDKDNFTK	1	3.28986e-23	155.17	Cluster 6	Clustered	2.44444
CL4234.Contig2_SANG_Gene.50590	49	CL4234.Contig2_SANG_Gene.50590		Enolase OS=Neocallimastix frontalis OX=4757 PE=3 SV=1	14	12	K	210	2	1	-1.5034	IGTETYHTLK(1)K	3	2.0003e-10	168.61	Cluster 2	Clustered	6.61111
CL3502.Contig5_SANG_Gene.46440	136	EFT1	EFT1	Elongation factor 2 OS=Komagataella pastoris OX=4922 GN=EFT1 PE=3 SV=1	13	66	K	605	2	1	0.32312	AIEAGK(1)INPR	1	0.00103922	93.345	Cluster 1	Clustered	52
Unigene4796_SANG_Gene.60789	35	rps3	rps3	40S ribosomal protein S3 OS=Schizosaccharomyces pombe (strain 972 / ATCC 24843) OX=284812 GN=rps3 PE=1 SV=1	11	64	K	203	2	1	0.69318	K(1)PLPDSVQIK	2	0.000233835	98.337	Cluster 1	Clustered	52
Unigene5883_SANG_Gene.61895	51	pi047	pi047	Adenosylhomocysteinase OS=Schizosaccharomyces pombe (strain 972 / ATCC 24843) OX=284812 GN=pi047 PE=3 SV=1	10	10	K	170	3	1	0.73845	GISEETTTGVHHLYK(1)NFR	2	0.000185885	74.776		Unclustered	2.7
CL2265.Contig2_SANG_Gene.36213	4	gpd	gpd	Glyceraldehyde-3-phosphate dehydrogenase OS=Lentinula edodes OX=5353 GN=gpd PE=2 SV=1	10	28	K	304	2	1	-0.42096	AGIALNK(1)NFVK	1	0.00103955	84.479	Cluster 2	Clustered	5.72727
CL5231.Contig1_SANG_Gene.55071	21	FOXG_03074	FOXG_03074	Transaldolase OS=Fusarium oxysporum f. sp. lycopersici (strain 4287 / CBS 123668 / FGSC 9935 / NRRL 34936) OX=426428 GN=FOXG_03074 PE=1 SV=1	10	13	K	84	2	1	0.062897	LLVEFGK(1)EILK	1	0.0178916	57.434	Cluster 2	Clustered	6.37778
CL2936.Contig1_SANG_Gene.41682	1	pgkA	pgkA	Phosphoglycerate kinase OS=Agaricus bisporus OX=5341 GN=pgkA PE=2 SV=1	9	21	K	50	3	1	-0.1052	IVAALPTIEYALK(1)NGAK	2	0.000248446	73.928	Cluster 2	Clustered	5.98182
Unigene6405_SANG_Gene.62586	84	HSS1	HSS1	Heat shock protein HSS1 OS=Puccinia graminis OX=5297 GN=HSS1 PE=3 SV=1	9	8	K	246	2	1	0.45997	LVNHFVQEFK(1)R	2	2.00413e-17	187.11	Cluster 6	Clustered	2.4
Unigene7212_SANG_Gene.63364	53	sks2	sks2	Ribosome-associated molecular chaperone sks2 OS=Schizosaccharomyces pombe (strain 972 / ATCC 24843) OX=284812 GN=sks2 PE=1 SV=2	9	11	K	595	2	1	0.0090915	K(1)SQLAIK	1	0.00687115	59.153		Unclustered	9
Unigene2050_SANG_Gene.58037	162	TEF1	TEF1	Elongation factor 1-alpha OS=Schizophyllum commune OX=5334 GN=TEF1 PE=3 SV=1	8	63	K	401	2	1	-0.55782	SGDACIAK(1)LVPSK	1	0.00816418	58.246	Cluster 1	Clustered	48
Unigene1346_SANG_Gene.57147	25	ATP1	ATP1	"ATP synthase subunit alpha, mitochondrial OS=Yarrowia lipolytica (strain CLIB 122 / E 150) OX=284591 GN=ATP1 PE=1 SV=1"	8	20	K	251	3	1	0.45689	STVAQLVK(1)TLEENDAMK	1	0.000386446	65.949	Cluster 3	Clustered	3.45
Unigene5114_SANG_Gene.61212	141	rpl402	rpl402	60S ribosomal protein L4-A OS=Schizosaccharomyces pombe (strain 972 / ATCC 24843) OX=284812 GN=rpl402 PE=1 SV=2	7	66	K	271	2	1	-0.32316	K(1)DYFLPTAK	1	0.0367121	73.36	Cluster 1	Clustered	52
Unigene1188_SANG_Gene.56912	57	RPL35A	RPL35A	60S ribosomal protein L35-A OS=Saccharomyces cerevisiae (strain ATCC 204508 / S288c) OX=559292 GN=RPL35A PE=1 SV=1	7	59	K	42	2	1	0.15889	IAGGSASK(1)LTK	1	0.0122475	61.409	Cluster 1	Clustered	52
Unigene5479_SANG_Gene.61499	48	met26	met26	Probable 5-methyltetrahydropteroyltriglutamate--homocysteine methyltransferase OS=Schizosaccharomyces pombe (strain 972 / ATCC 24843) OX=284812 GN=met26 PE=1 SV=1	7	3	K	745	2	1	1.186	VPSVEEIK(1)ER	1	0.000217938	107.09		Unclustered	1.66667
CL2912.Contig1_SANG_Gene.41545	38	6-PGD	6-PGD	"6-phosphogluconate dehydrogenase, decarboxylating OS=Cunninghamella elegans OX=4853 GN=6-PGD PE=2 SV=1"	7	7	K	27	3	1	-0.37992	VQHFLENEAK(1)GTK	1	0.00144275	55.297	Cluster 2	Clustered	5.78571
Unigene7385_SANG_Gene.63638	67	crp-74	crp-74	60S ribosomal protein L10a OS=Neurospora crassa (strain ATCC 24698 / 74-OR23-1A / CBS 708.71 / DSM 1257 / FGSC 987) OX=367110 GN=crp-74 PE=3 SV=1	6	59	K	59	2	1	0.58874	FSGTVK(1)LPNIPR	1	7.22407e-06	118.24	Cluster 1	Clustered	52
Unigene1419_SANG_Gene.57261	103	FUS3	FUS3	Glutathione S-transferase-like protein FUS3 OS=Gibberella fujikuroi (strain CBS 195.34 / IMI 58289 / NRRL A-6831) OX=1279085 GN=FUS3 PE=2 SV=1	6	61	K	203	2	1	0.31722	VK(1)EIFGETEYTEK	1	3.58838e-07	112.34	Cluster 1	Clustered	42.7216
CL2181.Contig2_SANG_Gene.35410	6	RPL6B	RPL6B	60S ribosomal protein L6-B OS=Saccharomyces cerevisiae (strain ATCC 204508 / S288c) OX=559292 GN=RPL6B PE=1 SV=4	6	61	K	63	2	1	-0.046773	LVPTSK(1)APR	1	0.0138527	71.03	Cluster 1	Clustered	52
Unigene8703_SANG_Gene.65031	140	RPS1	RPS1	40S ribosomal protein S1 OS=Postia placenta (strain ATCC 44394 / Madison 698-R) OX=561896 GN=RPS1 PE=3 SV=1	6	61	K	152	2	1	0.74992	K(1)TTYAQTSQIR	1	4.42296e-05	141.73	Cluster 1	Clustered	52
CL5072.Contig1_SANG_Gene.54438	173	RPL20A	RPL20A	60S ribosomal protein L20-A OS=Saccharomyces cerevisiae (strain ATCC 204508 / S288c) OX=559292 GN=RPL20A PE=1 SV=1	6	62	K	25	3	1	-0.31416	HLPTEAQPTPK(1)LYR	1	0.000181994	67.326	Cluster 1	Clustered	52
CL1771.Contig2_SANG_Gene.30366	62	RPL44	RPL44	60S ribosomal protein L44 OS=Coprinopsis cinerea (strain Okayama-7 / 130 / ATCC MYA-4618 / FGSC 9003) OX=240176 GN=RPL44 PE=3 SV=2	6	57	K	6	2	1	0.27561	VNIPK(1)TR	1	0.00362533	116.05	Cluster 1	Clustered	52
Unigene8203_SANG_Gene.64538	61	RPS6A	RPS6A	40S ribosomal protein S6 OS=Candida glabrata (strain ATCC 2001 / CBS 138 / JCM 3761 / NBRC 0622 / NRRL Y-65) OX=284593 GN=RPS6A PE=3 SV=1	6	58	K	149	2	1	-1.465	FFNLTK(1)EDDVTK	2	0.000752347	73.834	Cluster 1	Clustered	52
Unigene913_SANG_Gene.56720	16	Unigene913_SANG_Gene.56720		60S ribosomal protein L27a OS=Blumeria graminis f. sp. hordei OX=62688 PE=2 SV=1	6	59	K	84	2	1	0.34555	LWTLVPK(1)EEK	1	0.0292874	55.261	Cluster 1	Clustered	52
Unigene1421_SANG_Gene.57264	36	ATP2	ATP2	"ATP synthase subunit beta, mitochondrial OS=Yarrowia lipolytica (strain CLIB 122 / E 150) OX=284591 GN=ATP2 PE=1 SV=2"	6	27	K	159	2	1	0.30623	IPVGK(1)GTLGR	1	0.00537897	73.273	Cluster 2	Seed	7
Unigene3447_SANG_Gene.59379	92	SPBC1703.07	SPBC1703.07	Probable ATP-citrate synthase subunit 1 OS=Schizosaccharomyces pombe (strain 972 / ATCC 24843) OX=284812 GN=SPBC1703.07 PE=1 SV=1	6	8	K	92	3	1	-0.55569	LVAKPDQLIK(1)R	1	0.000210443	85.554	Cluster 3	Clustered	3.73333
Unigene3987_SANG_Gene.60106	121	htbA	htbA	Histone H2B OS=Agaricus bisporus OX=5341 GN=htbA PE=2 SV=3	6	1	K	11	2	1	-0.41472	PASTAGK(1)APASTASK	1	1.67242e-06	107.69		Unclustered	0
CL2427.Contig3_SANG_Gene.37647	159	ADH1	ADH1	Alcohol dehydrogenase 1 OS=Candida albicans OX=5476 GN=ADH1 PE=1 SV=1	6	2	K	401	2	1	0.26979	EVYEGLEK(1)GIVPGR	1	1.36685e-08	130.29		Unclustered	2
CL3155.Contig1_SANG_Gene.43753	167	rpl26	rpl26	60S ribosomal protein L26 OS=Schizosaccharomyces pombe (strain 972 / ATCC 24843) OX=284812 GN=rpl26 PE=3 SV=1	5	60	K	84	2	1	-0.89571	K(1)WVIHVDR	2	0.00239355	79.659	Cluster 1	Clustered	52
CL2446.Contig2_SANG_Gene.37805	31	rpl-7	rpl-7	60S ribosomal protein L7 OS=Neurospora crassa (strain ATCC 24698 / 74-OR23-1A / CBS 708.71 / DSM 1257 / FGSC 987) OX=367110 GN=rpl-7 PE=3 SV=2	5	59	K	230	3	1	-0.29607	K(1)FLHYVEGGDHGNR	2	8.77978e-08	110.12	Cluster 1	Clustered	52
Unigene8585_SANG_Gene.64870	11	hsp88	hsp88	Heat shock protein hsp88 OS=Neurospora crassa (strain ATCC 24698 / 74-OR23-1A / CBS 708.71 / DSM 1257 / FGSC 987) OX=367110 GN=hsp88 PE=1 SV=1	5	8	K	702	2	1	-0.40267	AK(1)NTDPVLTVADIAK	1	0.000344807	89.353		Unclustered	3.46667
Unigene4753_SANG_Gene.60730	177	hsp60	hsp60	Heat shock protein 60 OS=Emericella nidulans (strain FGSC A4 / ATCC 38163 / CBS 112.46 / NRRL 194 / M139) OX=227321 GN=hsp60 PE=1 SV=1	5	3	K	237	3	0.999742	-1.0753	TQK(1)AELEKPLVLLSEK	1	0.000896249	58.712		Unclustered	3
CL987.Contig1_SANG_Gene.18529	3	aac	aac	"ADP,ATP carrier protein OS=Neurospora crassa (strain ATCC 24698 / 74-OR23-1A / CBS 708.71 / DSM 1257 / FGSC 987) OX=367110 GN=aac PE=3 SV=1"	5	7	K	274	2	1	0.12949	K(1)EGTMSLFK	3	0.000635084	89.189	Cluster 3	Clustered	3.2381
CL4893.Contig1_SANG_Gene.53704	131	SPBC24C6.09c	SPBC24C6.09c	Probable phosphoketolase OS=Schizosaccharomyces pombe (strain 972 / ATCC 24843) OX=284812 GN=SPBC24C6.09c PE=3 SV=1	5	9	K	35	3	1	1.4027	SHLPSELGK(1)LSVK	1	3.8017e-05	81.448	Cluster 2	Clustered	5.78571
Unigene5842_SANG_Gene.61816	135	artA	artA	14-3-3 family protein artA OS=Aspergillus flavus (strain ATCC 200026 / FGSC A1120 / NRRL 3357 / JCM 12722 / SRRC 167) OX=332952 GN=artA PE=3 SV=1	5	1	K	119	3	1	0.56317	HLIPSAASGESK(1)VFYHK	1	1.1647e-07	107.72		Unclustered	0
CL863.Contig5_SANG_Gene.16780	88	rpl502	rpl502	60S ribosomal protein L5-B OS=Schizosaccharomyces pombe (strain 972 / ATCC 24843) OX=284812 GN=rpl502 PE=2 SV=1	4	63	K	53	2	1	0.12469	YNAPK(1)YR	1	0.00559421	109.01	Cluster 1	Clustered	52
CL897.Contig2_SANG_Gene.17365	45	rps1101	rps1101	40S ribosomal protein S11-A OS=Schizosaccharomyces pombe (strain 972 / ATCC 24843) OX=284812 GN=rps1101 PE=2 SV=1	4	61	K	155	2	1	1.0088	AATK(1)TFGK	1	0.0255752	68.49	Cluster 1	Clustered	52
CL2956.Contig2_SANG_Gene.41912	137	RPS4	RPS4	40S ribosomal protein S4 OS=Yarrowia lipolytica (strain CLIB 122 / E 150) OX=284591 GN=RPS4 PE=2 SV=1	4	60	K	104	2	1	1.2012	ITPEEASYK(1)LLK	1	0.0154251	53.3	Cluster 1	Clustered	52
Unigene544_SANG_Gene.56309	115	rps7	rps7	40S ribosomal protein S7 OS=Schizosaccharomyces pombe (strain 972 / ATCC 24843) OX=284812 GN=rps7 PE=1 SV=2	4	59	K	81	2	1	-0.16403	IQAK(1)LTR	1	0.00688155	106.68	Cluster 1	Clustered	52
Unigene8097_SANG_Gene.64362	147	bipA	bipA	Endoplasmic reticulum chaperone BiP OS=Aspergillus awamori OX=105351 GN=bipA PE=2 SV=1	4	3	K	426	2	1	0.21445	IPK(1)VQQLLK	1	0.011728	78.488		Unclustered	1.66667
Unigene3518_SANG_Gene.59505	163	AFUA_4G12850	AFUA_4G12850	Calnexin homolog OS=Neosartorya fumigata (strain ATCC MYA-4609 / Af293 / CBS 101355 / FGSC A1100) OX=330879 GN=AFUA_4G12850 PE=2 SV=2	4	6	K	59	2	1	-1.669	K(1)TPVGTETFSYVGK	1	0.00456353	67.326	Cluster 6	Clustered	2.7
Unigene2397_SANG_Gene.58360	119	rps20	rps20	40S ribosomal protein S20 OS=Schizosaccharomyces pombe (strain 972 / ATCC 24843) OX=284812 GN=rps20 PE=1 SV=1	4	61	K	35	2	1	0.78461	ITLTSSNVK(1)NLEK	1	0.000267928	82.59	Cluster 1	Clustered	52
CL1438.Contig2_SANG_Gene.25679	180	rpl44	rpl44	Probable 60S ribosomal protein L28e OS=Schizosaccharomyces pombe (strain 972 / ATCC 24843) OX=284812 GN=rpl44 PE=1 SV=1	4	54	K	108	2	1	-0.085142	AAGVAAQK(1)AK	1	0.000595449	96.113	Cluster 1	Clustered	52
CL1439.Contig7_SANG_Gene.25702	179	RPS18B	RPS18B	40S ribosomal protein S18-B OS=Saccharomyces cerevisiae (strain ATCC 204508 / S288c) OX=559292 GN=RPS18B PE=1 SV=1	4	58	K	27	2	1	0.10974	LLNTNVDGK(1)R	1	0.0083531	81.92	Cluster 1	Clustered	52
Unigene4797_SANG_Gene.60790	181	rps2	rps2	40S ribosomal protein S2 OS=Schizosaccharomyces pombe (strain 972 / ATCC 24843) OX=284812 GN=rps2 PE=1 SV=1	4	60	K	42	2	1	-0.36477	EWAPVTK(1)LGR	2	0.0001762	99.539	Cluster 1	Clustered	52
CL629.Contig3_SANG_Gene.12642	99	rpl1701	rpl1701	60S ribosomal protein L17-A OS=Schizosaccharomyces pombe (strain 972 / ATCC 24843) OX=284812 GN=rpl1701 PE=3 SV=1	4	58	K	81	2	1	0.17332	ASQAK(1)QFK	1	8.0738e-05	108.57	Cluster 1	Clustered	52
CL3569.Contig2_SANG_Gene.46911	39	RPL11	RPL11	60S ribosomal protein L11 OS=Ashbya gossypii (strain ATCC 10895 / CBS 109.51 / FGSC 9923 / NRRL Y-1056) OX=284811 GN=RPL11 PE=3 SV=1	4	61	K	53	2	1	-0.80096	VLEQLTGQTPVTSK(1)AR	1	3.67867e-35	207.43	Cluster 1	Clustered	52
CL637.Contig2_SANG_Gene.12748	126	RPS15	RPS15	40S ribosomal protein S15 OS=Podospora anserina OX=5145 GN=RPS15 PE=3 SV=1	4	59	K	38	3	1	1.3693	LLDMK(1)NEDFVELVHAR	1	0.00078052	43.592	Cluster 1	Clustered	52
CL3017.Contig3_SANG_Gene.42564	72	rps1201	rps1201	40S ribosomal protein S12-A OS=Schizosaccharomyces pombe (strain 972 / ATCC 24843) OX=284812 GN=rps1201 PE=3 SV=1	4	58	K	49	2	1	-0.207	MSVEDALK(1)QVLK	1	8.64226e-06	97.69	Cluster 1	Clustered	52
CL2581.Contig2_SANG_Gene.38722	102	MDH1	MDH1	"Malate dehydrogenase, mitochondrial OS=Schizosaccharomyces pombe (strain 972 / ATCC 24843) OX=284812 GN=MDH1 PE=3 SV=1"	4	16	K	233	2	1	1.453	SLAGEAYEK(1)LVHR	2	5.10308e-05	87.647	Cluster 3	Clustered	3.92308
CL5023.Contig2_SANG_Gene.54278	138	RPL24	RPL24	60S ribosomal protein L24 OS=Ashbya gossypii (strain ATCC 10895 / CBS 109.51 / FGSC 9923 / NRRL Y-1056) OX=284811 GN=RPL24 PE=3 SV=1	4	60	K	77	3	1	0.47287	TVK(1)HQGGIAGVNLQTYFDR	1	3.0487e-05	86.08	Cluster 1	Clustered	52
CL4432.Contig1_SANG_Gene.51612	148	ubi::crp-6	ubi::crp-6	Ubiquitin-40S ribosomal protein S27a OS=Neurospora crassa (strain ATCC 24698 / 74-OR23-1A / CBS 708.71 / DSM 1257 / FGSC 987) OX=367110 GN=ubi::crp-6 PE=1 SV=4	4	60	K	6	2	1	-0.31365	MQIFVK(1)TLTGK	1	0.0447892	45.992	Cluster 1	Clustered	52
Unigene6908_SANG_Gene.62900	87	MDH1	MDH1	"Malate dehydrogenase, mitochondrial OS=Schizosaccharomyces pombe (strain 972 / ATCC 24843) OX=284812 GN=MDH1 PE=3 SV=1"	4	16	K	69	2	1	-1.1526	ALK(1)GADIVVIPAGVPR	1	3.07334e-06	99.092	Cluster 3	Clustered	3.92308
Unigene6401_SANG_Gene.62583	120	TKT1	TKT1	Transketolase 1 OS=Candida albicans OX=5476 GN=TKT1 PE=3 SV=1	4	11	K	373	4	1	-0.2825	VIHTK(1)HPEVFLPSGIMER	2	0.000274601	71.651	Cluster 2	Clustered	6.22222
CL1292.Contig1_SANG_Gene.23335	151	SPAC24C9.06c	SPAC24C9.06c	"Aconitate hydratase, mitochondrial OS=Schizosaccharomyces pombe (strain 972 / ATCC 24843) OX=284812 GN=SPAC24C9.06c PE=3 SV=2"	4	7	K	656	3	1	-0.35544	VK(1)NHLTGGYDGVPQTAAYYR	1	8.37558e-05	55.588	Cluster 3	Clustered	3.73333
Unigene5041_SANG_Gene.61114	169	acuE	acuE	"Malate synthase, glyoxysomal OS=Emericella nidulans (strain FGSC A4 / ATCC 38163 / CBS 112.46 / NRRL 194 / M139) OX=227321 GN=acuE PE=3 SV=3"	4	9	K	152	3	0.991055	0.33621	LK(0.991)EK(0.009)PAVLIVR	1	0.000771115	68.972	Cluster 3	Clustered	4
Unigene2848_SANG_Gene.58722	5	spi1	spi1	GTP-binding nuclear protein spi1 OS=Schizosaccharomyces pombe (strain 972 / ATCC 24843) OX=284812 GN=spi1 PE=1 SV=1	4	6	K	156	2	1	1.0867	K(1)NLQYFEISAK	1	0.000209687	118.24		Unclustered	3
CL4872.Contig1_SANG_Gene.53616	111	pruA	pruA	Delta-1-pyrroline-5-carboxylate dehydrogenase OS=Agaricus bisporus OX=5341 GN=pruA PE=3 SV=1	4	2	K	389	2	1	0.75762	IVGYIQK(1)AK	1	0.0149375	67.334		Unclustered	2
Unigene5994_SANG_Gene.62030	158	TUB-1A	TUB-1A	Tubulin alpha-1A chain OS=Schizophyllum commune OX=5334 GN=TUB-1A PE=3 SV=1	4	4	K	120	2	1	-0.19618	EQIDVVMDK(1)IR	1	0.000688106	89.507		Unclustered	3
CL636.Contig1_SANG_Gene.12744	128	DLD1	DLD1	"D-lactate dehydrogenase [cytochrome] 1, mitochondrial OS=Saccharomyces cerevisiae (strain ATCC 204508 / S288c) OX=559292 GN=DLD1 PE=1 SV=2"	4	2	K	413	2	1	-1.1799	NK(1)EELALVR	1	0.028462	60.598		Unclustered	2
CL3783.Contig1_SANG_Gene.48127	34	GLNA	GLNA	Glutamine synthetase OS=Suillus bovinus OX=48563 GN=GLNA PE=3 SV=1	4	3	K	274	3	0.999961	-0.31495	KPGGIDHIK(1)K	1	0.00391554	50.46		Unclustered	1.66667
Unigene4038_SANG_Gene.60188	160	rpl3	rpl3	60S ribosomal protein L3 OS=Neosartorya fumigata (strain ATCC MYA-4609 / Af293 / CBS 101355 / FGSC A1100) OX=330879 GN=rpl3 PE=1 SV=2	3	63	K	391	2	1	0.70053	AAFLGPLK(1)PR	1	0.00374852	79.201	Cluster 1	Clustered	52
Unigene4133_SANG_Gene.60276	96	RPS17B	RPS17B	40S ribosomal protein S17-B OS=Saccharomyces cerevisiae (strain ATCC 204508 / S288c) OX=559292 GN=RPS17B PE=1 SV=1	3	61	K	67	2	1	-0.10896	IQK(1)GPVR	1	0.0149041	94.114	Cluster 1	Clustered	52
CL3400.Contig4_SANG_Gene.45717	125	CIA1	CIA1	Probable cytosolic iron-sulfur protein assembly protein 1 OS=Ustilago maydis (strain 521 / FGSC 9021) OX=237631 GN=CIA1 PE=3 SV=1	3	57	K	25	2	1	0.1186	VILLNSGESK(1)GK	1	6.40738e-06	124.07	Cluster 1	Clustered	52
Unigene4825_SANG_Gene.60840	154	RPS25B	RPS25B	40S ribosomal protein S25-B OS=Saccharomyces cerevisiae (strain ATCC 204508 / S288c) OX=559292 GN=RPS25B PE=1 SV=1	3	57	K	42	3	1	0.051991	AQHNVVLDK(1)TTYDR	1	1.16999e-05	95.197	Cluster 1	Clustered	52
CL4708.Contig2_SANG_Gene.52981	168	RPS13	RPS13	40S ribosomal protein S13 OS=Agaricus bisporus OX=5341 GN=RPS13 PE=2 SV=1	3	60	K	51	2	1	0.16735	K(1)GVTPSQIGVLLR	1	0.000600648	84.508	Cluster 1	Clustered	52
CL4916.Contig4_SANG_Gene.53814	109	CNBM1320	CNBM1320	Translationally-controlled tumor protein homolog OS=Cryptococcus neoformans var. neoformans serotype D (strain B-3501A) OX=283643 GN=CNBM1320 PE=3 SV=1	3	50	K	83	2	1	-0.38425	K(1)TYLTCLK	1	0.00206179	90.149	Cluster 1	Clustered	46
Unigene1303_SANG_Gene.57080	166	LEU2	LEU2	3-isopropylmalate dehydrogenase OS=Phanerochaete chrysosporium OX=5306 GN=LEU2 PE=2 SV=1	3	4	K	182	3	1	-0.56949	VAAK(1)IALAANPPHK	1	0.000171204	68.463		Unclustered	1.66667
CL3658.Contig2_SANG_Gene.47396	86	ANB1	ANB1	Eukaryotic translation initiation factor 5A-2 OS=Saccharomyces cerevisiae (strain ATCC 204508 / S288c) OX=559292 GN=ANB1 PE=1 SV=3	3	52	K	71	3	1	-0.21977	VHLVGIDIFTQK(1)K	1	0.000392041	63.29	Cluster 1	Clustered	45
CL3073.Contig4_SANG_Gene.43026	42	RPS10A	RPS10A	40S ribosomal protein S10-A OS=Saccharomyces cerevisiae (strain ATCC 204508 / S288c) OX=559292 GN=RPS10A PE=1 SV=1	3	58	K	25	2	1	-0.4585	K(1)DFNAPK	1	0.0096808	115.82	Cluster 1	Clustered	52
Unigene5413_SANG_Gene.61413	10	AN6010	AN6010	Heat shock 70 kDa protein OS=Emericella nidulans (strain FGSC A4 / ATCC 38163 / CBS 112.46 / NRRL 194 / M139) OX=227321 GN=AN6010 PE=1 SV=1	3	14	K	93	2	1	-0.44439	LVGLPAK(1)R	1	0.0432541	85.676		Unclustered	2.31111
CL4798.Contig2_SANG_Gene.53308	33	SUB2	SUB2	ATP-dependent RNA helicase SUB2 OS=Cryptococcus neoformans var. neoformans serotype D (strain JEC21 / ATCC MYA-565) OX=214684 GN=SUB2 PE=3 SV=1	3	7	K	46	3	1	0.34589	K(1)NFSGIHSTGFR	1	0.000888462	58.814		Unclustered	4
Unigene1279_SANG_Gene.57052	44	rpl-12	rpl-12	60S ribosomal protein L12 OS=Neurospora crassa (strain ATCC 24698 / 74-OR23-1A / CBS 708.71 / DSM 1257 / FGSC 987) OX=367110 GN=rpl-12 PE=3 SV=1	3	63	K	99	3	1	0.36681	NIK(1)HTGNIPFDEIVEIAR	1	4.70592e-08	110.75	Cluster 1	Clustered	52
Unigene2668_SANG_Gene.58509	7	ndk-1	ndk-1	Nucleoside diphosphate kinase OS=Neurospora crassa (strain ATCC 24698 / 74-OR23-1A / CBS 708.71 / DSM 1257 / FGSC 987) OX=367110 GN=ndk-1 PE=2 SV=2	3	8	K	73	3	1	1.2179	MVHATPEHLEK(1)HYEDLK	1	0.000280364	53.037		Unclustered	5
Unigene412_SANG_Gene.56058	146	Unigene412_SANG_Gene.56058		UDP-glucose dehydrogenase [Fomitiporia mediterranea MF3/22];EJD05323.1 UDP-glucose dehydrogenase [Fomitiporia mediterranea MF3/22]	3	1	K	34	2	1	-1.5865	DQK(1)AAIAPVK	1	0.0167078	62.088		Unclustered	0
CL3655.Contig1_SANG_Gene.47376	165	CL3655.Contig1_SANG_Gene.47376		60S ribosomal protein L25 OS=Puccinia graminis OX=5297 PE=2 SV=2	2	59	K	91	2	1	0.51974	K(1)SITHAPR	1	0.000176492	119.22	Cluster 1	Clustered	52
CL471.Contig7_SANG_Gene.10316	113	CL471.Contig7_SANG_Gene.10316		"Ornithine carbamoyltransferase, mitochondrial OS=Trametes hirsuta OX=5327 PE=3 SV=1"	2	1	K	366	3	1	-0.49218	K(1)SHEVDDEVFYGPR	1	0.00290077	47.113		Unclustered	0
CL1437.Contig1_SANG_Gene.25672	117	cpc-2	cpc-2	Guanine nucleotide-binding protein subunit beta-like protein OS=Neurospora crassa (strain ATCC 24698 / 74-OR23-1A / CBS 708.71 / DSM 1257 / FGSC 987) OX=367110 GN=cpc-2 PE=3 SV=1	2	65	K	175	3	1	0.88578	FSPNPQNPVIVSGGWDK(1)VVK	1	9.61754e-05	58.938	Cluster 1	Clustered	52
Unigene3993_SANG_Gene.60115	106	dld1	dld1	"Dihydrolipoyl dehydrogenase, mitochondrial OS=Schizosaccharomyces pombe (strain 972 / ATCC 24843) OX=284812 GN=dld1 PE=2 SV=2"	2	16	K	291	2	1	0.14391	ILAK(1)QGIK	1	0.0126871	68.016	Cluster 4	Clustered	5
Unigene645_SANG_Gene.56394	18	ATP3	ATP3	"ATP synthase subunit gamma, mitochondrial OS=Yarrowia lipolytica (strain CLIB 122 / E 150) OX=284591 GN=ATP3 PE=1 SV=2"	2	13	K	148	2	1	-0.86938	SK(1)AQLSR	1	0.0216366	85.533	Cluster 4	Clustered	4.27273
Unigene7336_SANG_Gene.63561	112	rpl2101	rpl2101	60S ribosomal protein L21-A OS=Schizosaccharomyces pombe (strain 972 / ATCC 24843) OX=284812 GN=rpl2101 PE=3 SV=1	2	59	K	125	2	1	-0.2414	AK(1)GEPAPSLR	1	0.000180831	100.38	Cluster 1	Clustered	52
Unigene8681_SANG_Gene.64998	58	RPL23A	RPL23A	60S ribosomal protein L23-A OS=Saccharomyces cerevisiae (strain ATCC 204508 / S288c) OX=559292 GN=RPL23A PE=1 SV=1	2	55	K	75	2	1	-1.1944	K(1)TMPIVIVR	2	0.00163986	65.842	Cluster 1	Clustered	52
CL894.Contig1_SANG_Gene.17323	139	crp-63	crp-63	60S ribosomal protein L32 OS=Neurospora crassa (strain ATCC 24698 / 74-OR23-1A / CBS 708.71 / DSM 1257 / FGSC 987) OX=367110 GN=crp-63 PE=3 SV=1	2	60	K	71	2	1	0.20139	K(1)FVVSNVR	1	0.0108105	137.05	Cluster 1	Clustered	52
Unigene6923_SANG_Gene.62915	83	rps801	rps801	40S ribosomal protein S8-A OS=Schizosaccharomyces pombe (strain 972 / ATCC 24843) OX=284812 GN=rps801 PE=3 SV=1	2	61	K	155	2	1	2.1808	ESK(1)IEPALAAQFGAGR	1	6.73758e-06	72.21	Cluster 1	Clustered	52
Unigene6756_SANG_Gene.62805	78	sdh1	sdh1	"Probable succinate dehydrogenase [ubiquinone] flavoprotein subunit, mitochondrial OS=Schizosaccharomyces pombe (strain 972 / ATCC 24843) OX=284812 GN=sdh1 PE=2 SV=1"	2	15	K	506	2	1	1.5272	NSDGPIPTAK(1)LR	1	0.000435507	78.564	Cluster 4	Seed	5.33333
CL2957.Contig1_SANG_Gene.41920	144	rpl31	rpl31	60S ribosomal protein L31 OS=Schizosaccharomyces pombe (strain 972 / ATCC 24843) OX=284812 GN=rpl31 PE=3 SV=1	2	57	K	73	2	1	0.40378	SVVQFAQK(1)SMGTK	1	0.000364975	78.228	Cluster 1	Clustered	52
Unigene7450_SANG_Gene.63741	54	cyc1	cyc1	Cytochrome c OS=Schizosaccharomyces pombe (strain 972 / ATCC 24843) OX=284812 GN=cyc1 PE=1 SV=3	2	13	K	90	2	1	0.0025747	MAFAGLK(1)K	1	0.0154213	42.338	Cluster 4	Clustered	5
CL253.Contig8_SANG_Gene.5854	43	PAT1	PAT1	Acetyl-CoA acetyltransferase OS=Yarrowia lipolytica (strain CLIB 122 / E 150) OX=284591 GN=PAT1 PE=3 SV=1	2	6	K	238	2	1	-1.8718	K(1)GDTIVK	1	0.0101193	56.013		Unclustered	3
Unigene6852_SANG_Gene.62855	127	rpl3602	rpl3602	60S ribosomal protein L36-B OS=Schizosaccharomyces pombe (strain 972 / ATCC 24843) OX=284812 GN=rpl3602 PE=3 SV=1	2	55	K	22	3	1	-0.047117	GLNK(1)GHTTTPIPK	1	0.0076788	41.542	Cluster 1	Clustered	52
CL1349.Contig2_SANG_Gene.24421	142	pgmA	pgmA	Phosphoglucomutase OS=Neosartorya fumigata (strain ATCC MYA-4609 / Af293 / CBS 101355 / FGSC A1100) OX=330879 GN=pgmA PE=3 SV=1	2	13	K	40	2	1	-0.36524	EIPTK(1)PYDGQK	1	0.00232639	76.073		Unclustered	4.90909
Unigene4832_SANG_Gene.60852	85	rps-5	rps-5	40S ribosomal protein S5 OS=Neurospora crassa (strain ATCC 24698 / 74-OR23-1A / CBS 708.71 / DSM 1257 / FGSC 987) OX=367110 GN=rps-5 PE=3 SV=2	2	58	K	23	2	1	1.4193	LFGK(1)WDASEVEVK	1	0.0123862	41.695	Cluster 1	Seed	52
CL3729.Contig2_SANG_Gene.47824	153	mcsA	mcsA	"2-methylcitrate synthase, mitochondrial OS=Neosartorya fumigata (strain CEA10 / CBS 144.89 / FGSC A1163) OX=451804 GN=mcsA PE=1 SV=1"	2	12	K	335	3	1	-0.4603	TLK(1)SGQVVPGYGHGVLR	1	0.00035269	56.081	Cluster 3	Clustered	3.77778
Unigene3772_SANG_Gene.59788	118	ECU02_1360	ECU02_1360	Proline--tRNA ligase OS=Encephalitozoon cuniculi (strain GB-M1) OX=284813 GN=ECU02_1360 PE=1 SV=2	2	6	K	650	2	1	-0.5502	LEFGPK(1)DSQK	1	0.0167078	62.088		Unclustered	1.71429
Unigene1792_SANG_Gene.57566	143	aldA	aldA	Aldehyde dehydrogenase OS=Agaricus bisporus OX=5341 GN=aldA PE=3 SV=1	2	4	K	92	2	1	-0.32055	VLTK(1)VSIGNK	1	0.000382971	97.439		Unclustered	1.66667
Unigene3083_SANG_Gene.59023	129	Unigene3083_SANG_Gene.59023		cofactor-independent phosphoglycerate mutase [Sanghuangporus baumii]	2	6	K	114	2	1	-1.863	ILEACK(1)RAK	1	0.0247923	57.59		Unclustered	4.7619
CL1511.Contig1_SANG_Gene.26797	20	ths1	ths1	"Threonine--tRNA ligase, cytoplasmic OS=Schizosaccharomyces pombe (strain 972 / ATCC 24843) OX=284812 GN=ths1 PE=3 SV=1"	2	4	K	340	2	1	0.88713	LYGISFPDK(1)K	1	0.00544396	48.568	Cluster 5	Clustered	3
Unigene3177_SANG_Gene.59167	69	cct7	cct7	Probable T-complex protein 1 subunit eta OS=Schizosaccharomyces pombe (strain 972 / ATCC 24843) OX=284812 GN=cct7 PE=1 SV=1	2	20	K	149	2	1	0.69278	K(1)AAQLAIER	1	0.0299237	81.92		Unclustered	16
CL2353.Contig2_SANG_Gene.36995	79	tpx1	tpx1	Peroxiredoxin tpx1 OS=Schizosaccharomyces pombe (strain 972 / ATCC 24843) OX=284812 GN=tpx1 PE=1 SV=1	2	4	K	158	2	1	0.34253	LVK(1)AFQFTDK	1	0.00228815	85.554		Unclustered	1.2
CL3278.Contig6_SANG_Gene.44746	172	MCR1.1	MCR1.1	NADH-cytochrome b5 reductase 1 OS=Laccaria bicolor (strain S238N-H82 / ATCC MYA-4686) OX=486041 GN=MCR1.1 PE=3 SV=1	2	2	K	180	2	1	-0.23171	TYEK(1)GNISR	1	0.00886129	85.813	Cluster 7	Clustered	2
CL377.Contig4_SANG_Gene.8451	8	CL377.Contig4_SANG_Gene.8451		Cytochrome b5 OS=Mortierella alpina OX=64518 PE=1 SV=1	2	3	K	18	3	1	-0.57218	K(1)DNLYLLIHGK	1	0.00451838	48.405	Cluster 7	Clustered	2
CL1662.Contig9_SANG_Gene.28880	91	ccp-1	ccp-1	"Cytochrome c peroxidase, mitochondrial OS=Neurospora crassa (strain ATCC 24698 / 74-OR23-1A / CBS 708.71 / DSM 1257 / FGSC 987) OX=367110 GN=ccp-1 PE=3 SV=1"	2	2	K	95	2	1	0.13855	VK(1)TNLVPTK	1	0.00894097	85.672		Unclustered	0.666667
Unigene8761_SANG_Gene.65081	110	PRX1	PRX1	"Peroxiredoxin PRX1, mitochondrial OS=Saccharomyces cerevisiae (strain ATCC 204508 / S288c) OX=559292 GN=PRX1 PE=1 SV=1"	2	2	K	212	3	1	-0.0028081	TLFPEFTIHK(1)PYLR	1	3.80769e-09	119.45	Cluster 8	Seed	2
CL4563.Contig2_SANG_Gene.52269	175	CL4563.Contig2_SANG_Gene.52269		Thioredoxin OS=Coprinus comatus OX=56187 PE=1 SV=1	2	3	K	104	2	1	0.44065	LQELIAK(1)AK	1	0.023546	63.046	Cluster 8	Clustered	1.66667
Unigene4417_SANG_Gene.60460	32	MCR1	MCR1	NADH-cytochrome b5 reductase 2 OS=Ustilago maydis (strain 521 / FGSC 9021) OX=237631 GN=MCR1 PE=3 SV=1	2	2	K	198	2	1	0.26043	PGETLAIK(1)GPIPK	1	1.9371e-07	102.65	Cluster 7	Seed	2
Unigene7217_SANG_Gene.63373	24	CYT1	CYT1	"Cytochrome c1, heme protein, mitochondrial OS=Kluyveromyces lactis (strain ATCC 8585 / CBS 2359 / DSM 70799 / NBRC 1267 / NRRL Y-1140 / WM37) OX=284590 GN=CYT1 PE=3 SV=1"	2	13	K	320	2	1	0.34721	K(1)ILYTPPVSK	1	0.0128293	76.073	Cluster 2	Clustered	5.78571
CL3327.Contig1_SANG_Gene.45234	105	qcr7	qcr7	Cytochrome b-c1 complex subunit 7 OS=Schizosaccharomyces pombe (strain 972 / ATCC 24843) OX=284812 GN=qcr7 PE=3 SV=1	2	8	K	124	2	1	-0.26824	AK(1)WNNVQVQR	1	0.000208937	105.46	Cluster 2	Clustered	5.78571
CL74.Contig4_SANG_Gene.1755	73	alcA	alcA	Alcohol dehydrogenase 1 OS=Emericella nidulans (strain FGSC A4 / ATCC 38163 / CBS 112.46 / NRRL 194 / M139) OX=227321 GN=alcA PE=3 SV=2	2	2	K	221	2	1	2.8955	K(1)LVLGYGAEK	1	0.0114347	77.894		Unclustered	2
CL1758.Contig3_SANG_Gene.30297	155	SPBC1703.13c	SPBC1703.13c	Probable mitochondrial phosphate carrier protein OS=Schizosaccharomyces pombe (strain 972 / ATCC 24843) OX=284812 GN=SPBC1703.13c PE=3 SV=1	2	4	K	59	2	1	0.63265	YK(1)GLASGLR	1	0.00886129	85.813	Cluster 3	Clustered	4
CL5235.Contig2_SANG_Gene.55095	17	ADK1	ADK1	Adenylate kinase OS=Coprinopsis cinerea (strain Okayama-7 / 130 / ATCC MYA-4618 / FGSC 9003) OX=240176 GN=ADK1 PE=3 SV=1	2	3	K	33	2	1	-0.6035	AVK(1)AVSPTPAEQLR	1	4.93601e-05	79.837		Unclustered	2
Unigene3481_SANG_Gene.59443	161	ACT1	ACT1	Actin-1 OS=Schizophyllum commune OX=5334 GN=ACT1 PE=2 SV=1	2	2	K	155	2	1	-0.098317	ELTALSPSSMK(1)VK	1	0.00313291	62.759		Unclustered	0.666667
CL1179.Contig1_SANG_Gene.21332	19	wos2	wos2	Protein wos2 OS=Schizosaccharomyces pombe (strain 972 / ATCC 24843) OX=284812 GN=wos2 PE=2 SV=1	2	4	K	81	2	1	-1.3909	LFGEIDAEK(1)SK	1	0.000691376	89.46		Unclustered	3
CL5206.Contig2_SANG_Gene.54993	12	CTHT_0041970.2	CTHT_0041970.2	40S ribosomal protein S24 OS=Chaetomium thermophilum (strain DSM 1495 / CBS 144.50 / IMI 039719) OX=759272 GN=CTHT_0041970.2 PE=1 SV=1	1	58	K	45	2	1	-0.43758	AELSEK(1)LAQIYK	1	6.29989e-06	107.99	Cluster 1	Clustered	52
Unigene4017_SANG_Gene.60149	29	HIS4	HIS4	Histidine biosynthesis trifunctional protein OS=Saccharomyces bayanus OX=4931 GN=HIS4 PE=3 SV=1	1	7	K	318	2	1	0.046288	LK(1)SAPEGSYTR	1	0.0129695	60.901		Unclustered	1.66667
Unigene865_SANG_Gene.56652	26	Unigene865_SANG_Gene.56652		60S acidic ribosomal protein P2 OS=Podospora anserina OX=5145 PE=3 SV=1	1	58	K	41	2	1	0.25444	LSK(1)LLSELDGK	1	7.4641e-05	118.73	Cluster 1	Clustered	52
CL1989.Contig2_SANG_Gene.33064	27	RPS0	RPS0	40S ribosomal protein S0 OS=Postia placenta (strain ATCC 44394 / Madison 698-R) OX=561896 GN=RPS0 PE=3 SV=1	1	57	K	59	2	1	-1.1723	TWEK(1)VVLAAR	1	0.0175782	49.448	Cluster 1	Clustered	52
CL3600.Contig2_SANG_Gene.47070	124	cdb4	cdb4	Curved DNA-binding protein OS=Schizosaccharomyces pombe (strain 972 / ATCC 24843) OX=284812 GN=cdb4 PE=1 SV=1	1	27	K	166	2	1	0.19718	LVK(1)VGNK	1	0.0430774	53.968		Unclustered	22.9233
CL977.Contig4_SANG_Gene.18455	178	RPL33A	RPL33A	60S ribosomal protein L33-A OS=Saccharomyces cerevisiae (strain ATCC 204508 / S288c) OX=559292 GN=RPL33A PE=1 SV=3	1	57	K	53	2	1	0.31645	EDAQFYLGK(1)R	1	0.00344301	92.112	Cluster 1	Clustered	52
CL1211.Contig2_SANG_Gene.21919	60	tef5	tef5	Elongation factor 1-beta OS=Schizosaccharomyces pombe (strain 972 / ATCC 24843) OX=284812 GN=tef5 PE=2 SV=1	1	57	K	169	2	1	0.81357	SIEK(1)PGLVWGASK	1	0.000930907	72.433	Cluster 1	Clustered	50
CL3547.Contig6_SANG_Gene.46788	64	RPL37A	RPL37A	60S ribosomal protein L37-A OS=Saccharomyces cerevisiae (strain ATCC 204508 / S288c) OX=559292 GN=RPL37A PE=1 SV=2	1	53	K	65	2	1	-0.77567	TCAQCGYPSAK(1)IR	1	0.000479632	79.346	Cluster 1	Clustered	52
Unigene520_SANG_Gene.56253	89	pkiA	pkiA	Pyruvate kinase OS=Agaricus bisporus OX=5341 GN=pkiA PE=2 SV=1	1	23	K	120	3	1	-1.5186	DNADIPVK(1)AGHEFVVTTDEK	1	7.54037e-05	74.905	Cluster 4	Clustered	4.45455
CL1777.Contig4_SANG_Gene.30430	68	idh2	idh2	"Isocitrate dehydrogenase [NAD] subunit 2, mitochondrial OS=Schizosaccharomyces pombe (strain 972 / ATCC 24843) OX=284812 GN=idh2 PE=1 SV=2"	1	10	K	374	2	1	-1.8777	IEK(1)AALSTIAEGK	1	0.00723586	59.471	Cluster 3	Seed	4.02778
CL4324.Contig2_SANG_Gene.51059	22	rpl2701	rpl2701	60S ribosomal protein L27-A OS=Schizosaccharomyces pombe (strain 972 / ATCC 24843) OX=284812 GN=rpl2701 PE=2 SV=2	1	61	K	35	2	1	-0.53718	VVVIK(1)QNDEGTK	1	2.35759e-06	139.3	Cluster 1	Clustered	52
CL671.Contig15_SANG_Gene.13504	13	rps22	rps22	40S ribosomal protein S22 OS=Agaricus bisporus OX=5341 GN=rps22 PE=2 SV=1	1	58	K	32	2	1	0.28446	PSSK(1)VIIK	1	0.0152589	86.014	Cluster 1	Clustered	52
Unigene162_SANG_Gene.55591	82	TIF35	TIF35	Eukaryotic translation initiation factor 3 subunit G OS=Ustilago maydis (strain 521 / FGSC 9021) OX=237631 GN=TIF35 PE=3 SV=1	1	32	K	126	2	1	0.43526	AALQK(1)AGVSGVR	1	0.0134566	44.925		Unclustered	31
Unigene8590_SANG_Gene.64881	40	EGD1	EGD1	Nascent polypeptide-associated complex subunit beta OS=Phaeosphaeria nodorum (strain SN15 / ATCC MYA-4574 / FGSC 10173) OX=321614 GN=EGD1 PE=3 SV=1	1	39	K	47	2	1	0.31229	LQGALK(1)K	1	0.00698632	60.118		Unclustered	39
CL862.Contig2_SANG_Gene.16756	101	qcr-2	qcr-2	"Cytochrome b-c1 complex subunit 2, mitochondrial OS=Neurospora crassa (strain ATCC 24698 / 74-OR23-1A / CBS 708.71 / DSM 1257 / FGSC 987) OX=367110 GN=qcr-2 PE=2 SV=2"	1	11	K	218	2	1	0.32297	LLEK(1)NLK	1	0.0345728	74.301	Cluster 4	Clustered	5.06667
Unigene7318_SANG_Gene.63535	50	RLI1	RLI1	Translation initiation factor RLI1 OS=Chaetomium thermophilum (strain DSM 1495 / CBS 144.50 / IMI 039719) OX=759272 GN=RLI1 PE=3 SV=2	1	5	K	115	2	1	-0.82065	STALK(1)ILAGK	1	0.0257613	57.175		Unclustered	4
Unigene6395_SANG_Gene.62578	63	SPBC776.03	SPBC776.03	Probable homoserine dehydrogenase OS=Schizosaccharomyces pombe (strain 972 / ATCC 24843) OX=284812 GN=SPBC776.03 PE=1 SV=1	1	4	K	225	2	1	-0.12151	K(1)LTILSR	1	0.00345329	82.645		Unclustered	2
Unigene3054_SANG_Gene.58984	37	rpl1802	rpl1802	60S ribosomal protein L18-B OS=Schizosaccharomyces pombe (strain 972 / ATCC 24843) OX=284812 GN=rpl1802 PE=1 SV=1	1	62	K	48	2	1	0.1449	TDSSFNK(1)VILR	1	6.63541e-05	108.72	Cluster 1	Clustered	52
Unigene7033_SANG_Gene.63096	9	rpl-15	rpl-15	60S ribosomal protein L15 OS=Neurospora crassa (strain ATCC 24698 / 74-OR23-1A / CBS 708.71 / DSM 1257 / FGSC 987) OX=367110 GN=rpl-15 PE=3 SV=1	1	62	K	56	2	1	-0.29259	AK(1)QGYVVYR	1	0.012767	74.841	Cluster 1	Clustered	52
CL5237.Contig2_SANG_Gene.55103	100	hsp10	hsp10	"10 kDa heat shock protein, mitochondrial OS=Schizosaccharomyces pombe (strain 972 / ATCC 24843) OX=284812 GN=hsp10 PE=1 SV=1"	1	9	K	11	2	1	-0.40326	SIK(1)AVIPLLDR	1	0.00348474	69.261		Unclustered	2.14286
Unigene371_SANG_Gene.55995	77	gpi1	gpi1	Glucose-6-phosphate isomerase OS=Agaricus bisporus OX=5341 GN=gpi1 PE=3 SV=1	1	20	K	520	2	1	-0.33624	VLAK(1)AILAQLGK	1	9.22896e-05	88.163	Cluster 2	Clustered	5.72727
Unigene1820_SANG_Gene.57614	93	GPH1	GPH1	Glycogen phosphorylase OS=Saccharomyces cerevisiae (strain ATCC 204508 / S288c) OX=559292 GN=GPH1 PE=1 SV=4	1	5	K	283	2	1	-0.35644	LWESK(1)PIR	1	0.0079434	71.451		Unclustered	4
CL2276.Contig1_SANG_Gene.36292	75	ACS-1	ACS-1	Acetyl-coenzyme A synthetase OS=Coprinopsis cinerea (strain Okayama-7 / 130 / ATCC MYA-4618 / FGSC 9003) OX=240176 GN=ACS-1 PE=3 SV=1	1	5	K	206	2	1	0.39712	GGK(1)TIATK	1	0.0255782	68.485		Unclustered	3
CL4204.Contig7_SANG_Gene.50407	97	B7H23.070	B7H23.070	Mitochondrial outer membrane protein porin OS=Neurospora crassa (strain ATCC 24698 / 74-OR23-1A / CBS 708.71 / DSM 1257 / FGSC 987) OX=367110 GN=B7H23.070 PE=2 SV=1	1	8	K	121	2	1	0.17059	VQPTSK(1)SVLFNAAYK	1	0.000519356	62.94	Cluster 4	Clustered	5
CL4634.Contig2_SANG_Gene.52613	70	crp-46	crp-46	60S ribosomal protein L16 OS=Neurospora crassa (strain ATCC 24698 / 74-OR23-1A / CBS 708.71 / DSM 1257 / FGSC 987) OX=367110 GN=crp-46 PE=3 SV=1	1	62	K	172	2	1	-1.6533	IK(1)AQAFYER	1	0.0138113	71.176	Cluster 1	Clustered	52
CL392.Contig4_SANG_Gene.8716	80	icdA	icdA	"Isocitrate dehydrogenase [NADP], mitochondrial OS=Aspergillus niger OX=5061 GN=icdA PE=2 SV=1"	1	16	K	188	2	1	-0.33371	PVPGWTK(1)PIVIGR	1	0.010124	55.66	Cluster 4	Clustered	4.93333
CL1246.Contig2_SANG_Gene.22425	76	FBA1	FBA1	Fructose-bisphosphate aldolase OS=Kluyveromyces lactis (strain ATCC 8585 / CBS 2359 / DSM 70799 / NBRC 1267 / NRRL Y-1140 / WM37) OX=284590 GN=FBA1 PE=3 SV=2	1	11	K	32	2	1	-0.16822	K(1)VFEYAR	1	0.0417219	94.006	Cluster 2	Clustered	6.37778
Unigene6839_SANG_Gene.62847	108	cct1	cct1	T-complex protein 1 subunit alpha OS=Schizosaccharomyces pombe (strain 972 / ATCC 24843) OX=284812 GN=cct1 PE=3 SV=1	1	14	K	200	2	1	-0.016757	YPVK(1)AVNVLK	1	0.0108972	65.241		Unclustered	7.82222
CL181.Contig2_SANG_Gene.4254	114	pdcA	pdcA	Pyruvate decarboxylase OS=Neosartorya fumigata (strain ATCC MYA-4609 / Af293 / CBS 101355 / FGSC A1100) OX=330879 GN=pdcA PE=3 SV=1	1	9	K	47	2	1	0.23067	K(1)YNDITNWK	1	0.00295674	139.74	Cluster 4	Clustered	5
CL2731.Contig3_SANG_Gene.40075	74	FRS1	FRS1	Phenylalanine--tRNA ligase beta subunit OS=Candida albicans OX=5476 GN=FRS1 PE=2 SV=3	1	3	K	543	2	1	-3.6946	EK(1)QDPTFFPGR	1	0.0209509	43.68	Cluster 5	Clustered	3
CL3480.Contig1_SANG_Gene.46256	98	SPBC12C2.07c	SPBC12C2.07c	Spermidine synthase OS=Schizosaccharomyces pombe (strain 972 / ATCC 24843) OX=284812 GN=SPBC12C2.07c PE=3 SV=1	1	5	K	103	2	1	0.19288	K(1)VLVIGGGDGGVVR	1	0.000456129	58.246		Unclustered	4
CL3197.Contig1_SANG_Gene.44106	52	mlo3	mlo3	mRNA export protein mlo3 OS=Schizosaccharomyces pombe (strain 972 / ATCC 24843) OX=284812 GN=mlo3 PE=1 SV=1	1	1	K	66	2	1	-0.61866	VLGTSNTTAAK(1)AAAK	1	1.25967e-06	109.36		Unclustered	0
CL2872.Contig1_SANG_Gene.41297	133	ATP7	ATP7	"ATP synthase subunit d, mitochondrial OS=Yarrowia lipolytica (strain CLIB 122 / E 150) OX=284591 GN=ATP7 PE=1 SV=1"	1	10	K	4	2	1	-1.0791	ASK(1)GAAVALDFAK	1	0.000790812	58.885	Cluster 2	Clustered	6
Unigene4146_SANG_Gene.60294	174	tif212	tif212	Probable eukaryotic translation initiation factor 2 subunit beta OS=Schizosaccharomyces pombe (strain 972 / ATCC 24843) OX=284812 GN=tif212 PE=1 SV=2	1	6	K	365	2	1	0.99202	SPDTLLQK(1)ENR	1	0.00281333	70.889		Unclustered	2.7
CL1690.Contig1_SANG_Gene.29411	122	FPR4	FPR4	FK506-binding protein 4 OS=Cryptococcus neoformans var. neoformans serotype D (strain JEC21 / ATCC MYA-565) OX=214684 GN=FPR4 PE=3 SV=1	1	3	K	24	2	1	-0.99777	K(1)ASLTAQSDIR	1	0.00371547	81.904		Unclustered	0.5
CL1966.Contig2_SANG_Gene.32840	23	pin1	pin1	Peptidyl-prolyl cis-trans isomerase pin1 OS=Rhizopus delemar (strain RA 99-880 / ATCC MYA-4621 / FGSC 9543 / NRRL 43880) OX=246409 GN=pin1 PE=3 SV=1	1	1	K	69	3	1	-1.587	ASHLLVK(1)HR	1	0.00457213	54.259		Unclustered	0
Unigene3652_SANG_Gene.59607	2	SPAC24C9.12c	SPAC24C9.12c	"Probable serine hydroxymethyltransferase, cytosolic OS=Schizosaccharomyces pombe (strain 972 / ATCC 24843) OX=284812 GN=SPAC24C9.12c PE=3 SV=1"	1	4	K	401	2	1	-0.40547	NAVSGDK(1)SAQTPGGIR	1	2.74093e-13	135.18		Unclustered	1.66667
Unigene2058_SANG_Gene.58047	90	HAS1	HAS1	ATP-dependent RNA helicase HAS1 OS=Cryptococcus neoformans var. neoformans serotype D (strain JEC21 / ATCC MYA-565) OX=214684 GN=HAS1 PE=3 SV=1	1	3	K	316	4	1	-0.079907	YHAELLNYIDVPVLDLHGK(1)QK	1	8.81258e-06	74.873		Unclustered	2
CL1356.Contig5_SANG_Gene.24475	81	FDH1	FDH1	Formate dehydrogenase OS=Candida boidinii OX=5477 GN=FDH1 PE=1 SV=1	1	3	K	317	2	1	-0.45637	GAICDK(1)DAVAAAIK	1	0.00124606	72.433		Unclustered	3
CL400.Contig1_SANG_Gene.8832	184	IPP1	IPP1	Inorganic pyrophosphatase OS=Debaryomyces hansenii (strain ATCC 36239 / CBS 767 / JCM 1990 / NBRC 0083 / IGC 2968) OX=284592 GN=IPP1 PE=3 SV=1	1	3	K	91	2	1	-0.36636	EEPFNPIK(1)QDVK	1	0.0172368	41.014		Unclustered	3
CL499.Contig6_SANG_Gene.10751	152	TIF1	TIF1	ATP-dependent RNA helicase eIF4A OS=Ustilago maydis (strain 521 / FGSC 9021) OX=237631 GN=TIF1 PE=3 SV=1	1	9	K	59	3	1	-0.23145	AIVPVIK(1)GHDVIAQAQSGTGK	1	1.03819e-06	89.859		Unclustered	8
Unigene1306_SANG_Gene.57086	183	ACU-7	ACU-7	Isocitrate lyase OS=Coprinopsis cinerea (strain Okayama-7 / 130 / ATCC MYA-4618 / FGSC 9003) OX=240176 GN=ACU-7 PE=3 SV=1	1	4	K	221	2	1	-0.81446	GAAGIHIEDQAPGTK(1)K	1	5.10581e-07	113.54		Unclustered	1.4
CL2761.Contig1_SANG_Gene.40336	56	HYR1	HYR1	Glutathione peroxidase-like peroxiredoxin HYR1 OS=Saccharomyces cerevisiae (strain ATCC 204508 / S288c) OX=559292 GN=HYR1 PE=1 SV=1	1	5	K	200	2	1	0.22785	IK(1)WNFEK	1	0.032314	76.1	Cluster 8	Clustered	1.66667
CL1270.Contig2_SANG_Gene.22902	47	tca-9	tca-9	"Succinate--CoA ligase [ADP-forming] subunit beta, mitochondrial OS=Neurospora crassa (strain ATCC 24698 / 74-OR23-1A / CBS 708.71 / DSM 1257 / FGSC 987) OX=367110 GN=tca-9 PE=3 SV=1"	1	7	K	9	2	1	-0.35652	LITK(1)QTGEK	1	0.0269639	61.344		Unclustered	1.85714
CL4024.Contig3_SANG_Gene.49509	28	fyu1	fyu1	Probable UTP--glucose-1-phosphate uridylyltransferase OS=Schizosaccharomyces pombe (strain 972 / ATCC 24843) OX=284812 GN=fyu1 PE=1 SV=2	1	4	K	55	2	1	0.96633	LVASVQDPATK(1)K	1	0.0200645	61.409		Unclustered	3
Unigene1720_SANG_Gene.57449	132	Unigene1720_SANG_Gene.57449		Protein disulfide-isomerase OS=Humicola insolens OX=34413 PE=1 SV=1	1	2	K	422	2	1	-0.63417	LK(1)PTWDSLGER	1	0.000788193	88.075		Unclustered	2
CL1660.Contig1_SANG_Gene.28830	46	UBC1	UBC1	Ubiquitin-conjugating enzyme E2-16 kDa OS=Colletotrichum gloeosporioides OX=474922 GN=UBC1 PE=2 SV=1	1	1	K	8	2	1	-0.31096	INK(1)ELIDLGR	1	0.000205315	104.81		Unclustered	0
Unigene3098_SANG_Gene.59048	156	irs1	irs1	"Isoleucine--tRNA ligase, cytoplasmic OS=Schizosaccharomyces pombe (strain 972 / ATCC 24843) OX=284812 GN=irs1 PE=3 SV=1"	1	3	K	409	2	1	0.34554	SK(1)TPLIYR	1	0.0306912	55.314	Cluster 5	Seed	3
Unigene4042_SANG_Gene.60197	123	nuo40	nuo40	"NADH-ubiquinone oxidoreductase 40 kDa subunit, mitochondrial OS=Neurospora crassa (strain ATCC 24698 / 74-OR23-1A / CBS 708.71 / DSM 1257 / FGSC 987) OX=367110 GN=nuo40 PE=1 SV=2"	1	6	K	34	2	1	0.46575	K(1)PIVSYGPPGR	1	0.000873075	73.877	Cluster 4	Clustered	5
Unigene8785_SANG_Gene.65101	55	xyl1	xyl1	Probable NAD(P)H-dependent D-xylose reductase xyl1 OS=Emericella nidulans (strain FGSC A4 / ATCC 38163 / CBS 112.46 / NRRL 194 / M139) OX=227321 GN=xyl1 PE=3 SV=1	1	3	K	122	2	1	0.42419	YVDPK(1)HR	1	0.00857189	91.318		Unclustered	2
CL2864.Contig3_SANG_Gene.41203	30	xdhA	xdhA	Probable D-xylulose reductase A OS=Neosartorya fumigata (strain ATCC MYA-4609 / Af293 / CBS 101355 / FGSC A1100) OX=330879 GN=xdhA PE=3 SV=2	1	1	K	350	3	1	0.20417	YDFDHAVEAFETTK(1)LGK	1	0.00372484	42.052		Unclustered	0
Unigene5521_SANG_Gene.61566	66	LEUA	LEUA	3-isopropylmalate dehydratase OS=Rhizomucor pusillus OX=4840 GN=LEUA PE=3 SV=1	1	4	K	7	2	1	0.18894	PAPVLK(1)PR	1	0.043557	60.892		Unclustered	1.2
Unigene770_SANG_Gene.56571	15	ILV5	ILV5	"Ketol-acid reductoisomerase, mitochondrial OS=Saccharomyces cerevisiae (strain ATCC 204508 / S288c) OX=559292 GN=ILV5 PE=1 SV=1"	1	3	K	155	2	1	0.24503	ETLFPIEEAIK(1)R	1	0.0338335	56.527		Unclustered	2
CL1933.Contig3_SANG_Gene.32413	94	SPBC216.04c	SPBC216.04c	Uncharacterized protein C216.04c OS=Schizosaccharomyces pombe (strain 972 / ATCC 24843) OX=284812 GN=SPBC216.04c PE=3 SV=1	1	1	K	32	2	1	-0.49531	K(1)YEQIILEK	1	0.0298055	82.069		Unclustered	0
CL4439.Contig1_SANG_Gene.51653	0	grx2	grx2	Glutaredoxin-2 OS=Schizosaccharomyces pombe (strain 972 / ATCC 24843) OX=284812 GN=grx2 PE=3 SV=1	1	1	K	60	2	1	0.71533	AK(1)QLLSGK	1	0.0292238	56.043		Unclustered	0
CL3982.Contig2_SANG_Gene.49277	104	prp19	prp19	Pre-mRNA-processing factor 19 OS=Schizosaccharomyces pombe (strain 972 / ATCC 24843) OX=284812 GN=prp19 PE=1 SV=1	1	1	K	131	2	1	-0.57943	IVLSASADK(1)TAR	1	0.000623067	75.764		Unclustered	0
CL4013.Contig1_SANG_Gene.49442	157	tom70	tom70	Mitochondrial import receptor subunit tom70 OS=Neurospora crassa (strain ATCC 24698 / 74-OR23-1A / CBS 708.71 / DSM 1257 / FGSC 987) OX=367110 GN=tom70 PE=2 SV=3	1	1	K	123	2	1	1.6388	SLATELK(1)LR	1	0.00560523	91.549		Unclustered	0
CL910.Contig9_SANG_Gene.17534	71	fps1	fps1	Farnesyl pyrophosphate synthase OS=Schizosaccharomyces pombe (strain 972 / ATCC 24843) OX=284812 GN=fps1 PE=1 SV=1	1	1	K	51	2	1	-1.0572	NNLDYNVPGGK(1)LNR	1	3.86835e-15	165.34		Unclustered	0
CL200.Contig8_SANG_Gene.4698	164	TRPC	TRPC	Multifunctional tryptophan biosynthesis protein OS=Phanerochaete chrysosporium OX=5306 GN=TRPC PE=3 SV=1	1	1	K	278	2	1	0.11384	AEDTSK(1)FIR	1	0.0106087	82.417		Unclustered	0
CL1072.Contig4_SANG_Gene.19812	59	osm1	osm1	Fumarate reductase OS=Schizosaccharomyces pombe (strain 972 / ATCC 24843) OX=284812 GN=osm1 PE=3 SV=1	1	1	K	375	2	1	0.93082	TFADYSAAAK(1)ANK	1	0.0321907	48.216		Unclustered	0
