# Supplementary material for: Systematic Analysis of the Lysine Malonylome in Sanghuangporus Sanghuang
Source: Research Square preprint supplement (doi:10.21203/rs.3.rs-128142/v1), 2020-12-18
Supplement: Supplementary file 5 [file b7068f8d26137b1abb680f1c.xlsx]

## Sheet: Table S5
Table S5. The modified proteins based on KEGG pathway enrichment analysis
KEGG pathway	Mapping	Background	All Mapping	All Background	Fold enrichment	Fisher's exact test p value	-log10(p value)	Related proteins
Ribosome	52	163	168	5623	10.68	5.42566e-13	12.27	Unigene7336_SANG_Gene.63561 Unigene4825_SANG_Gene.60840 CL1439.Contig7_SANG_Gene.25702 Unigene6852_SANG_Gene.62855 Unigene7385_SANG_Gene.63638 CL2181.Contig2_SANG_Gene.35410 Unigene8203_SANG_Gene.64538 CL3655.Contig1_SANG_Gene.47376 CL5072.Contig1_SANG_Gene.54438 CL894.Contig1_SANG_Gene.17323 CL4432.Contig1_SANG_Gene.51612 CL1989.Contig2_SANG_Gene.33064 CL1771.Contig2_SANG_Gene.30366 CL863.Contig…
Glyoxylate and dicarboxylate metabolism	12	52	168	5623	7.72	2.49782e-08	7.6	CL3729.Contig2_SANG_Gene.47824 Unigene5041_SANG_Gene.61114 Unigene3652_SANG_Gene.59607 CL2276.Contig1_SANG_Gene.36292 CL2581.Contig2_SANG_Gene.38722 CL3783.Contig1_SANG_Gene.48127 Unigene1306_SANG_Gene.57086 CL253.Contig8_SANG_Gene.5854 Unigene3993_SANG_Gene.60115 CL1292.Contig1_SANG_Gene.23335 Unigene6908_SANG_Gene.62900 CL1356.Contig5_SANG_Gene.24475
Glycolysis / Gluconeogenesis	16	146	168	5623	3.67	5.86079e-06	5.23	CL74.Contig4_SANG_Gene.1755 CL2936.Contig1_SANG_Gene.41682 Unigene1792_SANG_Gene.57566 Unigene520_SANG_Gene.56253 Unigene3993_SANG_Gene.60115 CL4234.Contig2_SANG_Gene.50590 CL13.Contig3_SANG_Gene.272 CL2265.Contig2_SANG_Gene.36213 Unigene3083_SANG_Gene.59023 CL181.Contig2_SANG_Gene.4254 CL2276.Contig1_SANG_Gene.36292 CL1349.Contig2_SANG_Gene.24421 Unigene371_SANG_Gene.55995 CL2427.Contig3_SANG_Ge…
Citrate cycle (TCA cycle)	10	59	168	5623	5.67	7.68717e-06	5.11	Unigene3447_SANG_Gene.59379 CL3729.Contig2_SANG_Gene.47824 CL1777.Contig4_SANG_Gene.30430 CL2581.Contig2_SANG_Gene.38722 CL1270.Contig2_SANG_Gene.22902 Unigene3993_SANG_Gene.60115 CL1292.Contig1_SANG_Gene.23335 CL392.Contig4_SANG_Gene.8716 Unigene6756_SANG_Gene.62805 Unigene6908_SANG_Gene.62900
Methane metabolism	6	51	168	5623	3.94	0.00384448	2.42	Unigene3083_SANG_Gene.59023 CL1246.Contig2_SANG_Gene.22425 CL4234.Contig2_SANG_Gene.50590 Unigene3652_SANG_Gene.59607 CL2276.Contig1_SANG_Gene.36292 CL1356.Contig5_SANG_Gene.24475
Oxidative phosphorylation	10	136	168	5623	2.46	0.00720077	2.14	Unigene7217_SANG_Gene.63373 Unigene4042_SANG_Gene.60197 CL3327.Contig1_SANG_Gene.45234 CL2872.Contig1_SANG_Gene.41297 Unigene645_SANG_Gene.56394 Unigene1421_SANG_Gene.57264 Unigene1346_SANG_Gene.57147 CL862.Contig2_SANG_Gene.16756 CL400.Contig1_SANG_Gene.8832 Unigene6756_SANG_Gene.62805
Pyruvate metabolism	9	122	168	5623	2.47	0.0103847	1.98	Unigene1792_SANG_Gene.57566 Unigene5041_SANG_Gene.61114 Unigene520_SANG_Gene.56253 CL2276.Contig1_SANG_Gene.36292 CL2581.Contig2_SANG_Gene.38722 CL253.Contig8_SANG_Gene.5854 Unigene3993_SANG_Gene.60115 Unigene6908_SANG_Gene.62900 CL636.Contig1_SANG_Gene.12744
Pentose phosphate pathway	6	77	168	5623	2.61	0.0268682	1.57	Unigene371_SANG_Gene.55995 CL1349.Contig2_SANG_Gene.24421 CL1246.Contig2_SANG_Gene.22425 CL4893.Contig1_SANG_Gene.53704 CL5231.Contig1_SANG_Gene.55071 CL2912.Contig1_SANG_Gene.41545
Propanoate metabolism	5	57	168	5623	2.94	0.0268854	1.57	CL1270.Contig2_SANG_Gene.22902 Unigene3993_SANG_Gene.60115 CL253.Contig8_SANG_Gene.5854 CL797.Contig8_SANG_Gene.15657 CL2276.Contig1_SANG_Gene.36292
Protein processing in endoplasmic reticulum	10	173	168	5623	1.93	0.033629	1.47	CL3722.Contig1_SANG_Gene.47787 CL1660.Contig1_SANG_Gene.28830 Unigene3518_SANG_Gene.59505 Unigene5111_SANG_Gene.61210 Unigene1720_SANG_Gene.57449 CL2117.Contig9_SANG_Gene.34641 Unigene8097_SANG_Gene.64362 Unigene7212_SANG_Gene.63364 Unigene6405_SANG_Gene.62586 Unigene2834_SANG_Gene.58703
