# Supplementary figures and images for: Systematic Analysis of the Lysine Malonylome in Sanghuangporus Sanghuang
Source: Research Square preprint supplement (doi:10.21203/rs.3.rs-128142/v1), 2020-12-18

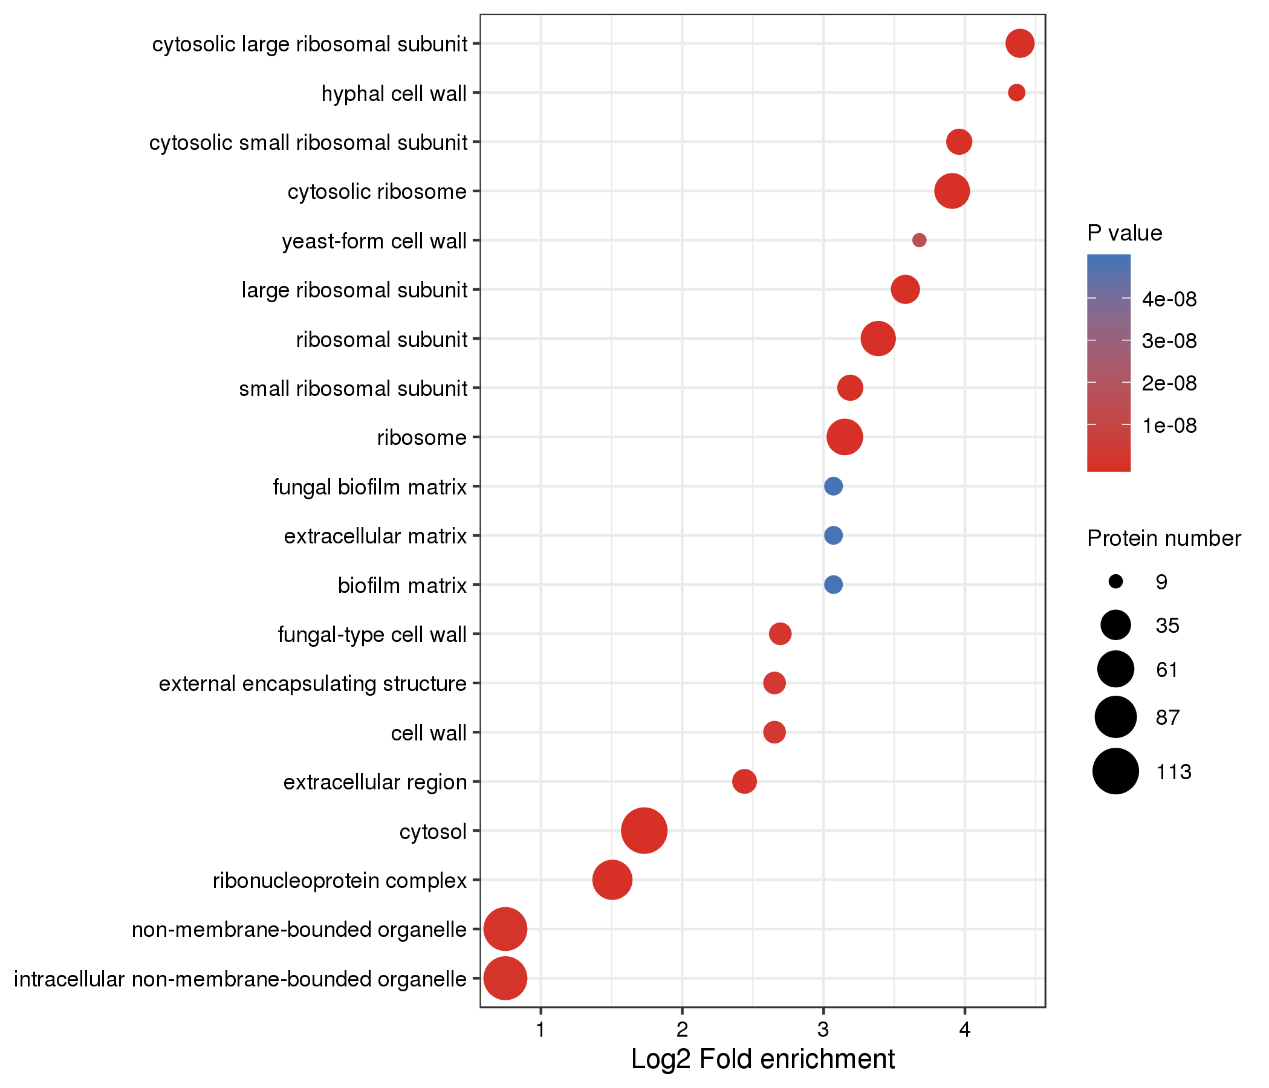


Figure S2. GO-based enrichment analysis in *S. sanghuang*

Supplement: Supplementary file 2 [file 0c042253185135f267b26251.docx]

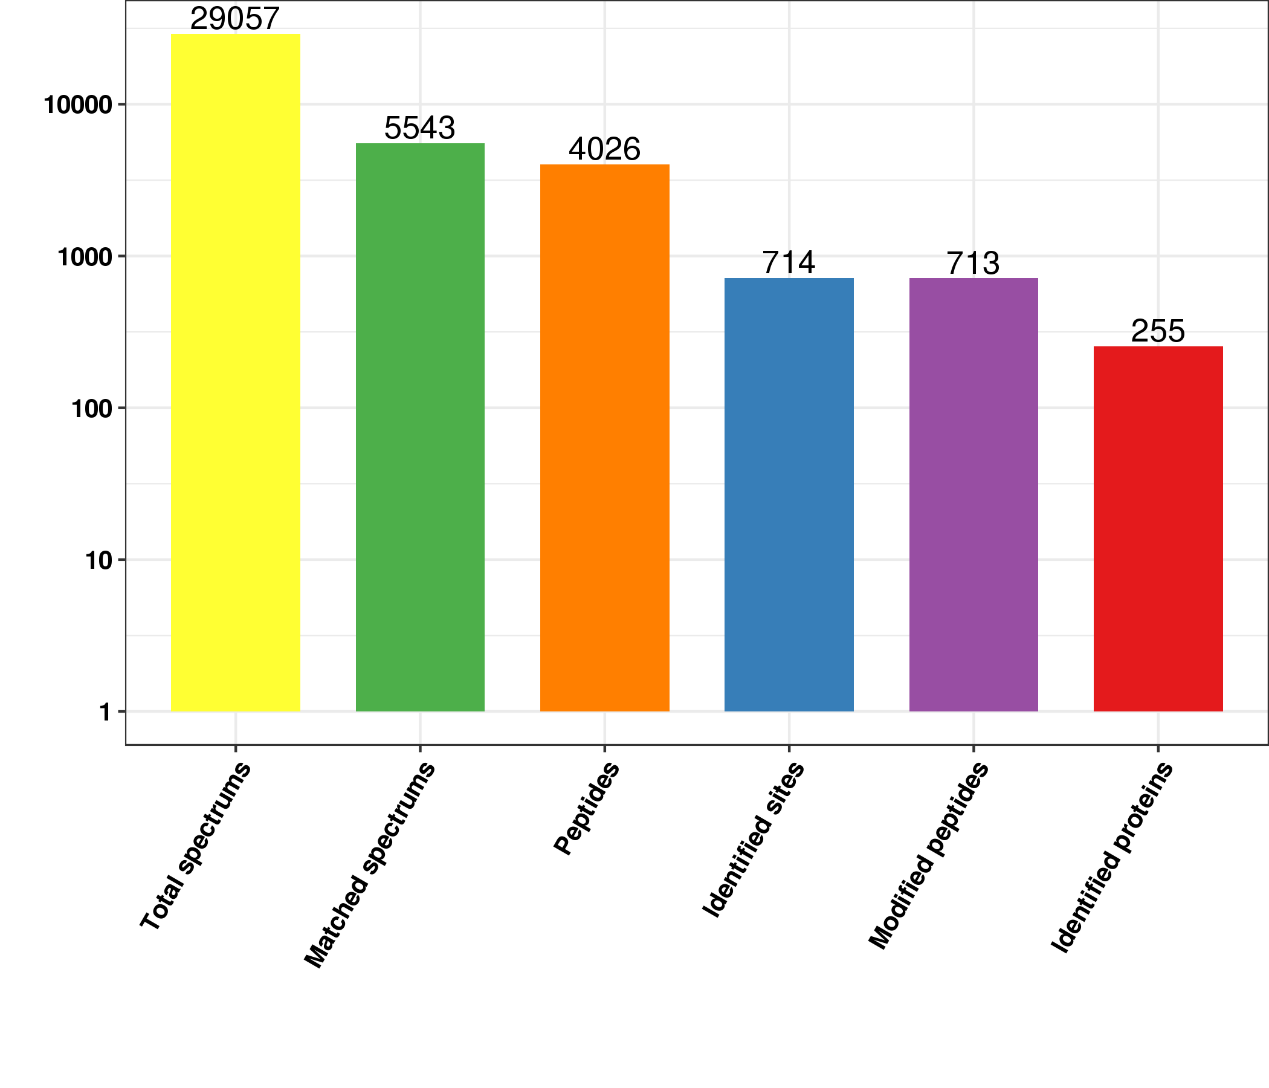
Figure S1. The MS/MS spectra of examples of malonyl peptides

Supplement: Supplementary file 4 [file 3470113f021a57f967ea3b0f.docx]
